# Supplementary material
Source: MDPI journal article supplement (https://www.mdpi.com/2072-4292/14/6/1312)

Elevation differences between check points and model

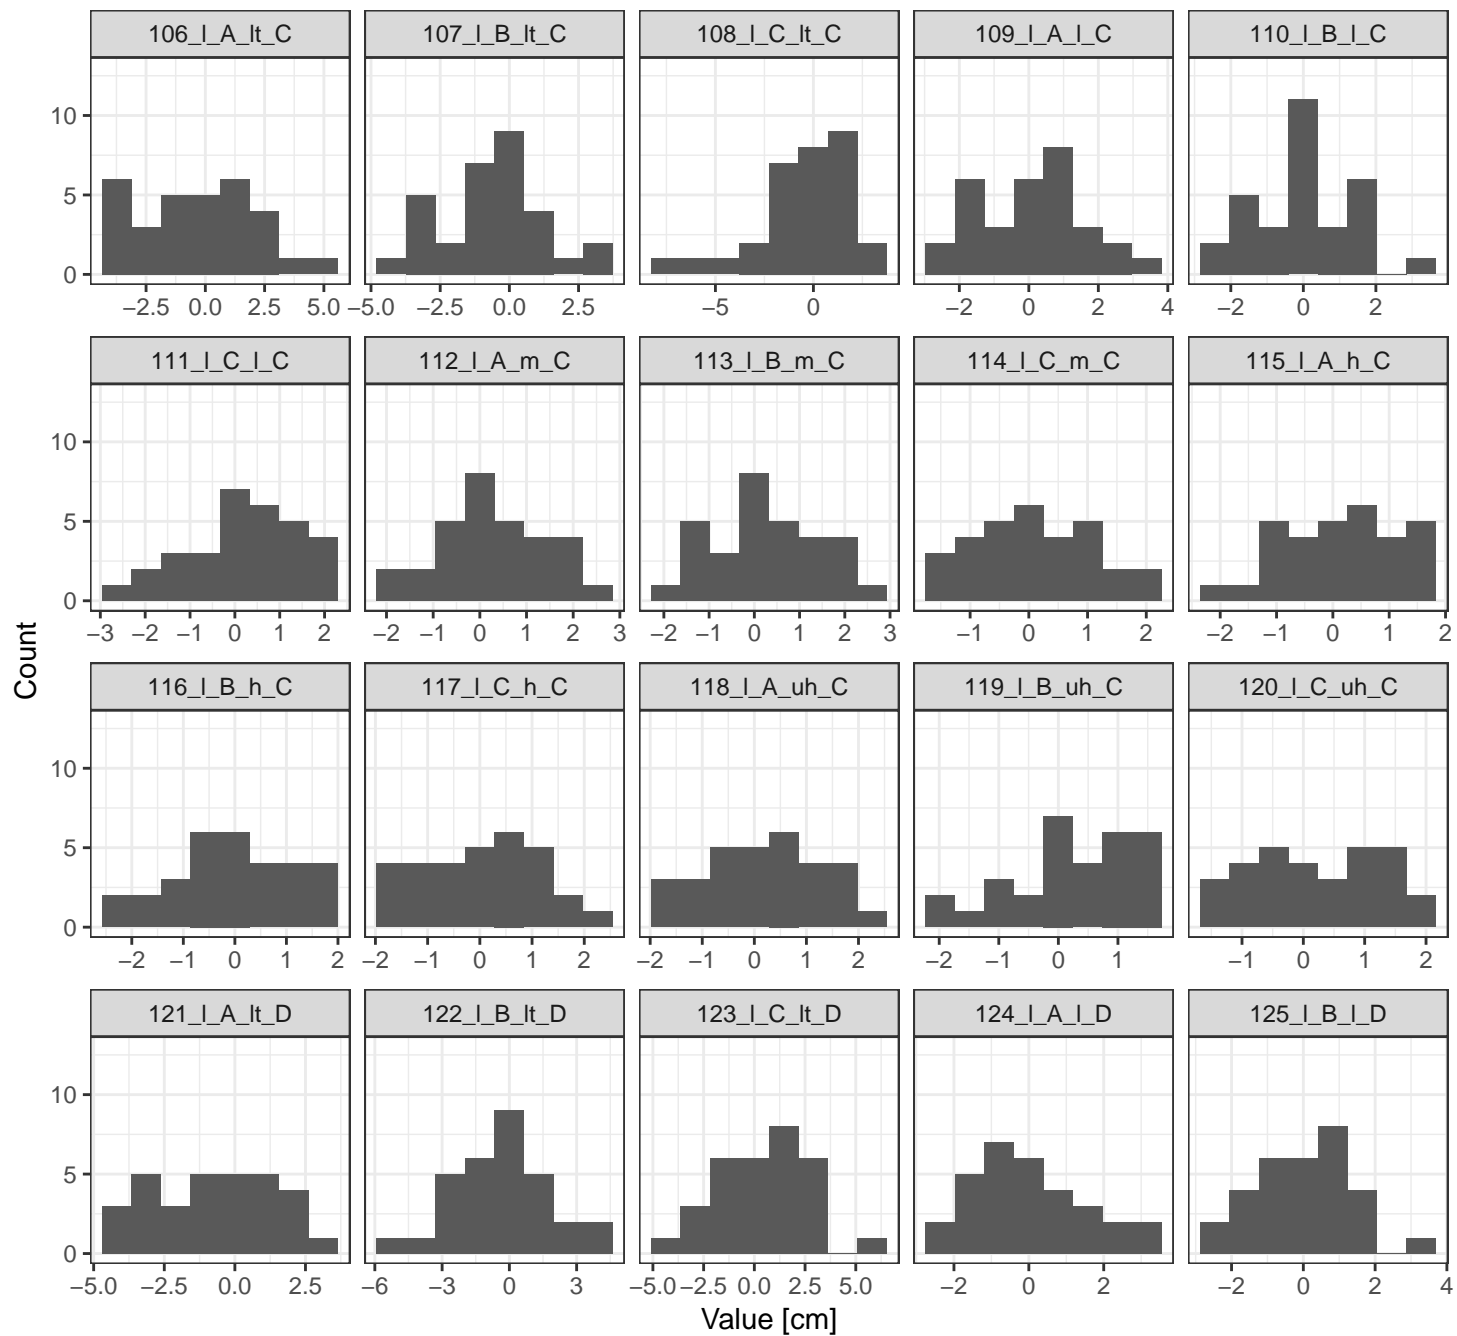

Elevation differences between check points and model

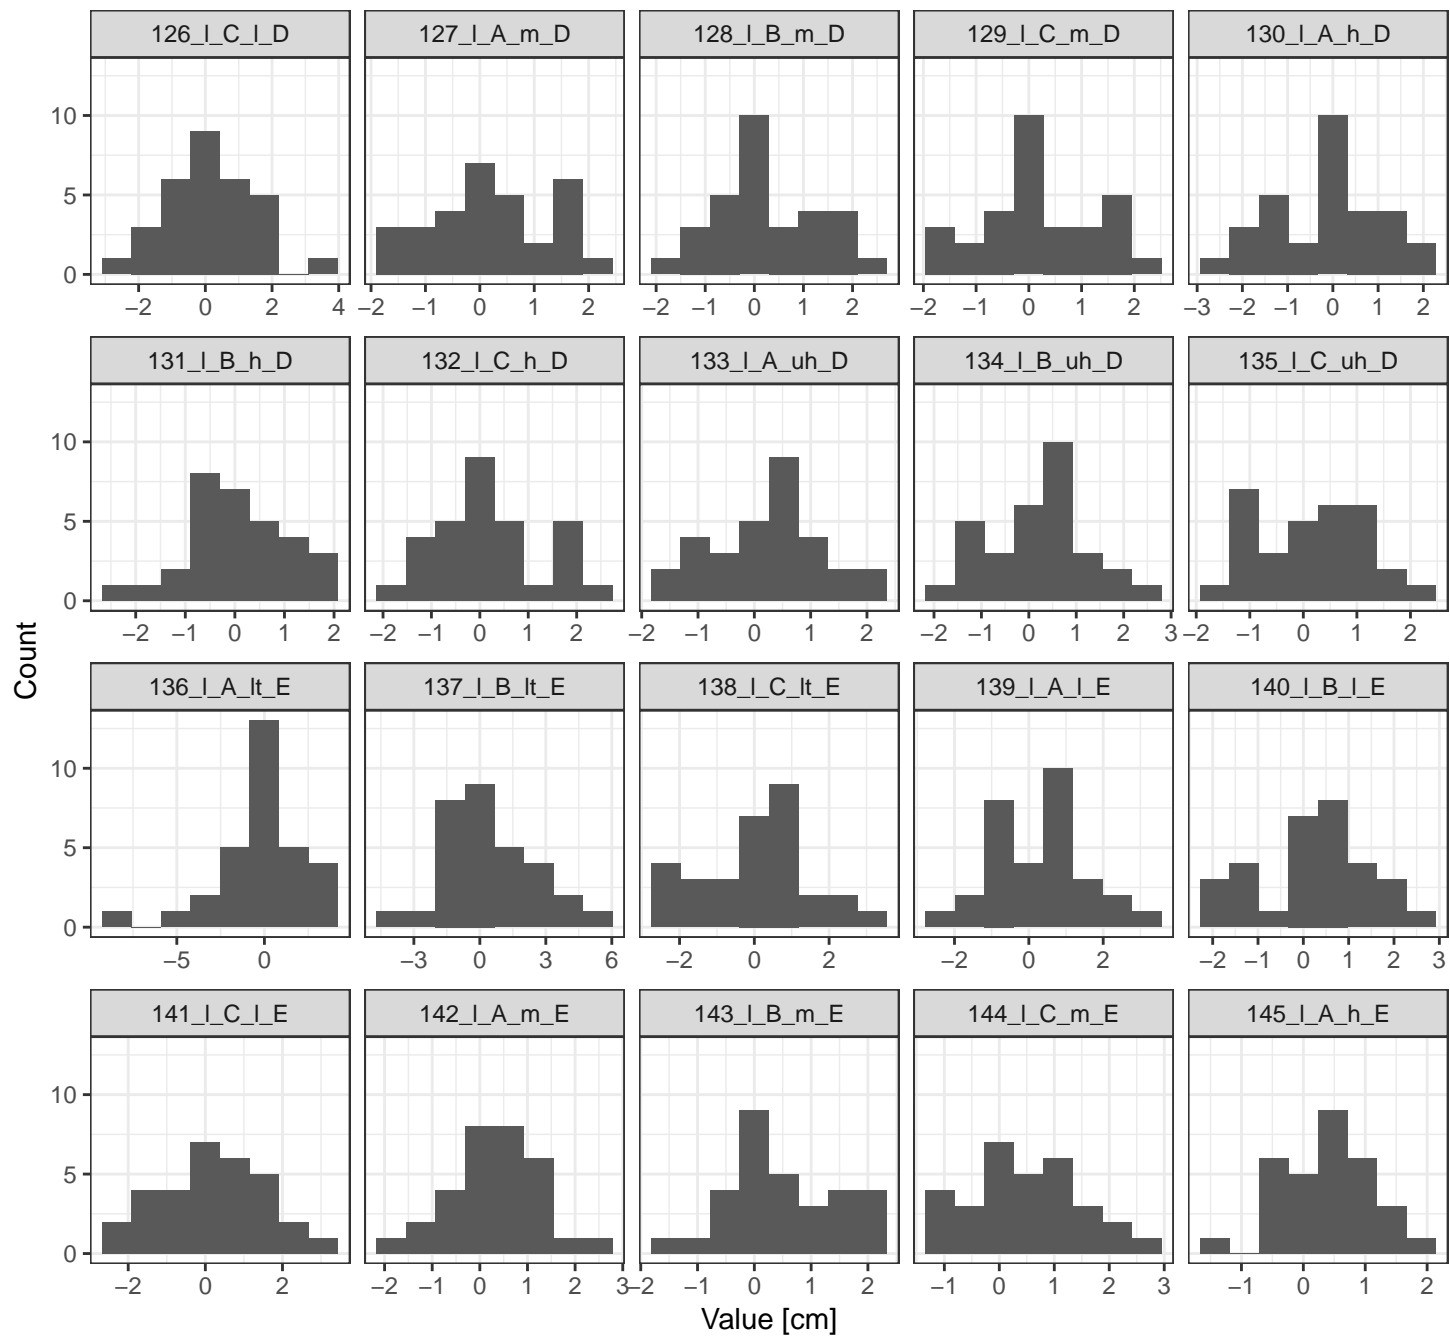

# Elevation differences between check points and model

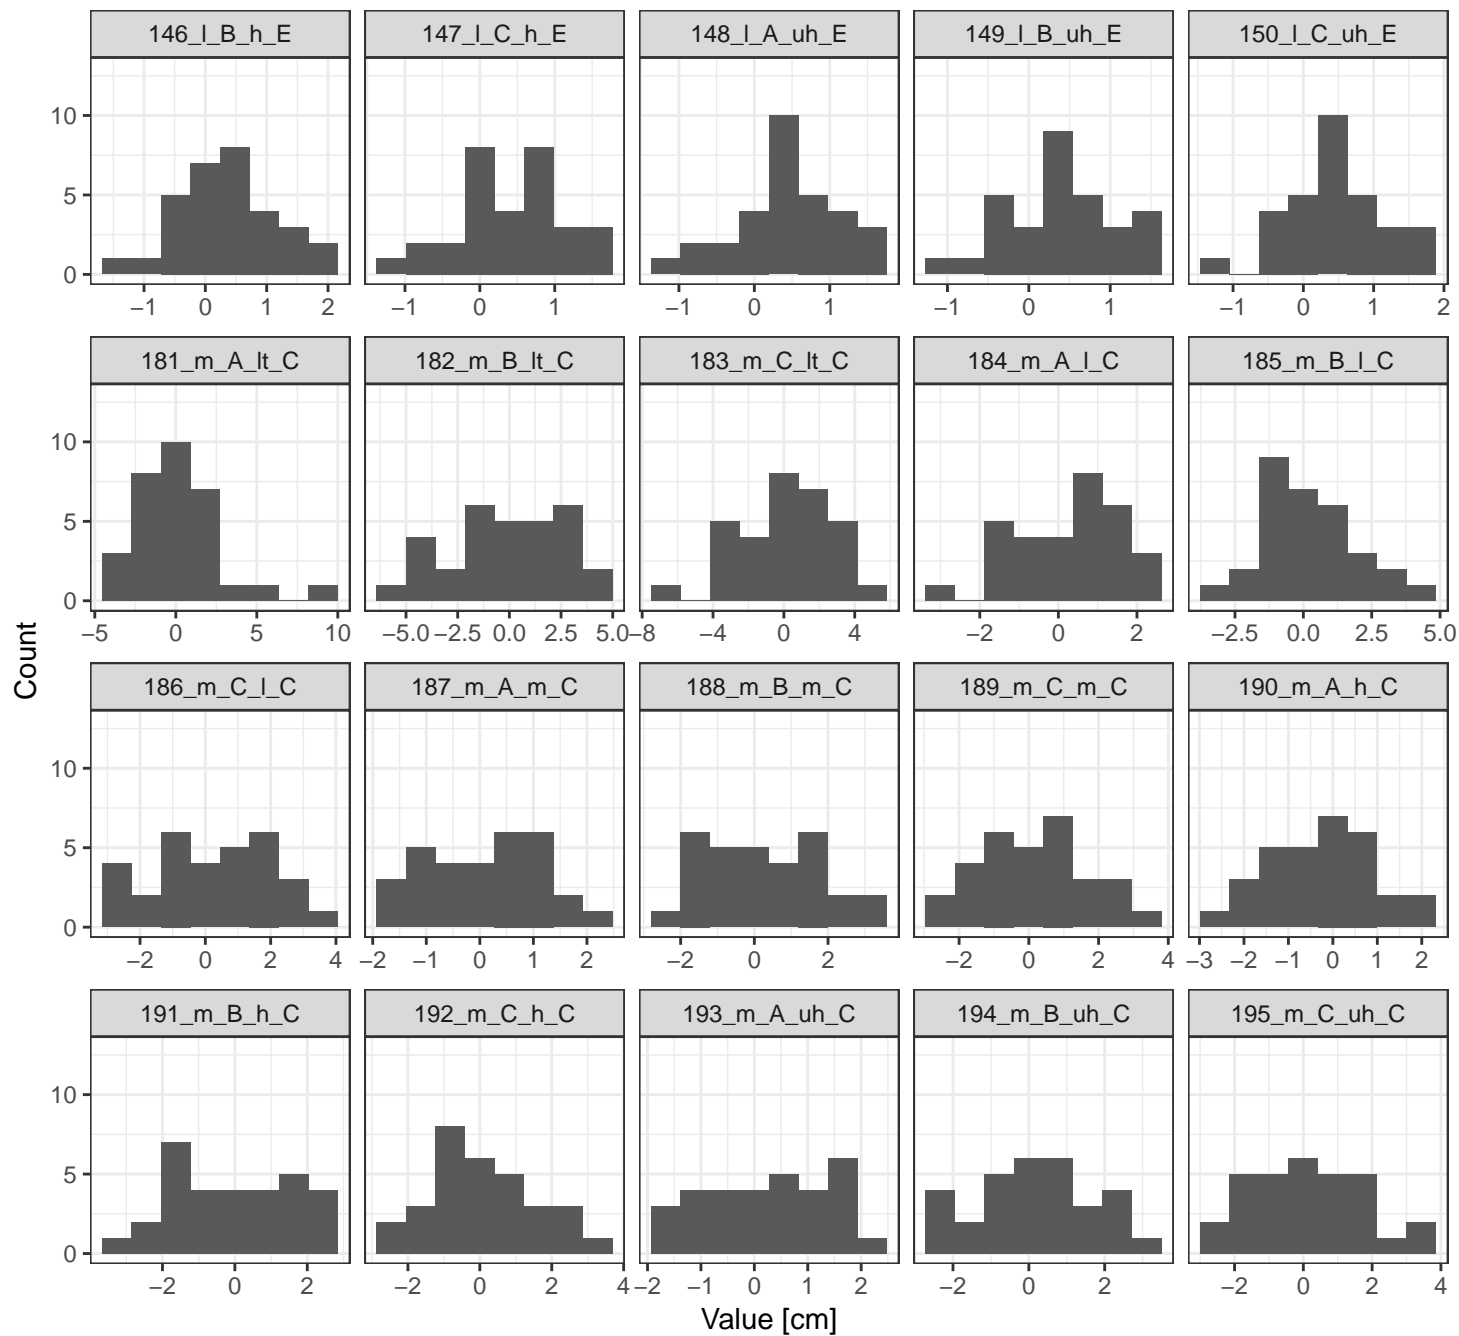

# Elevation differences between check points and model

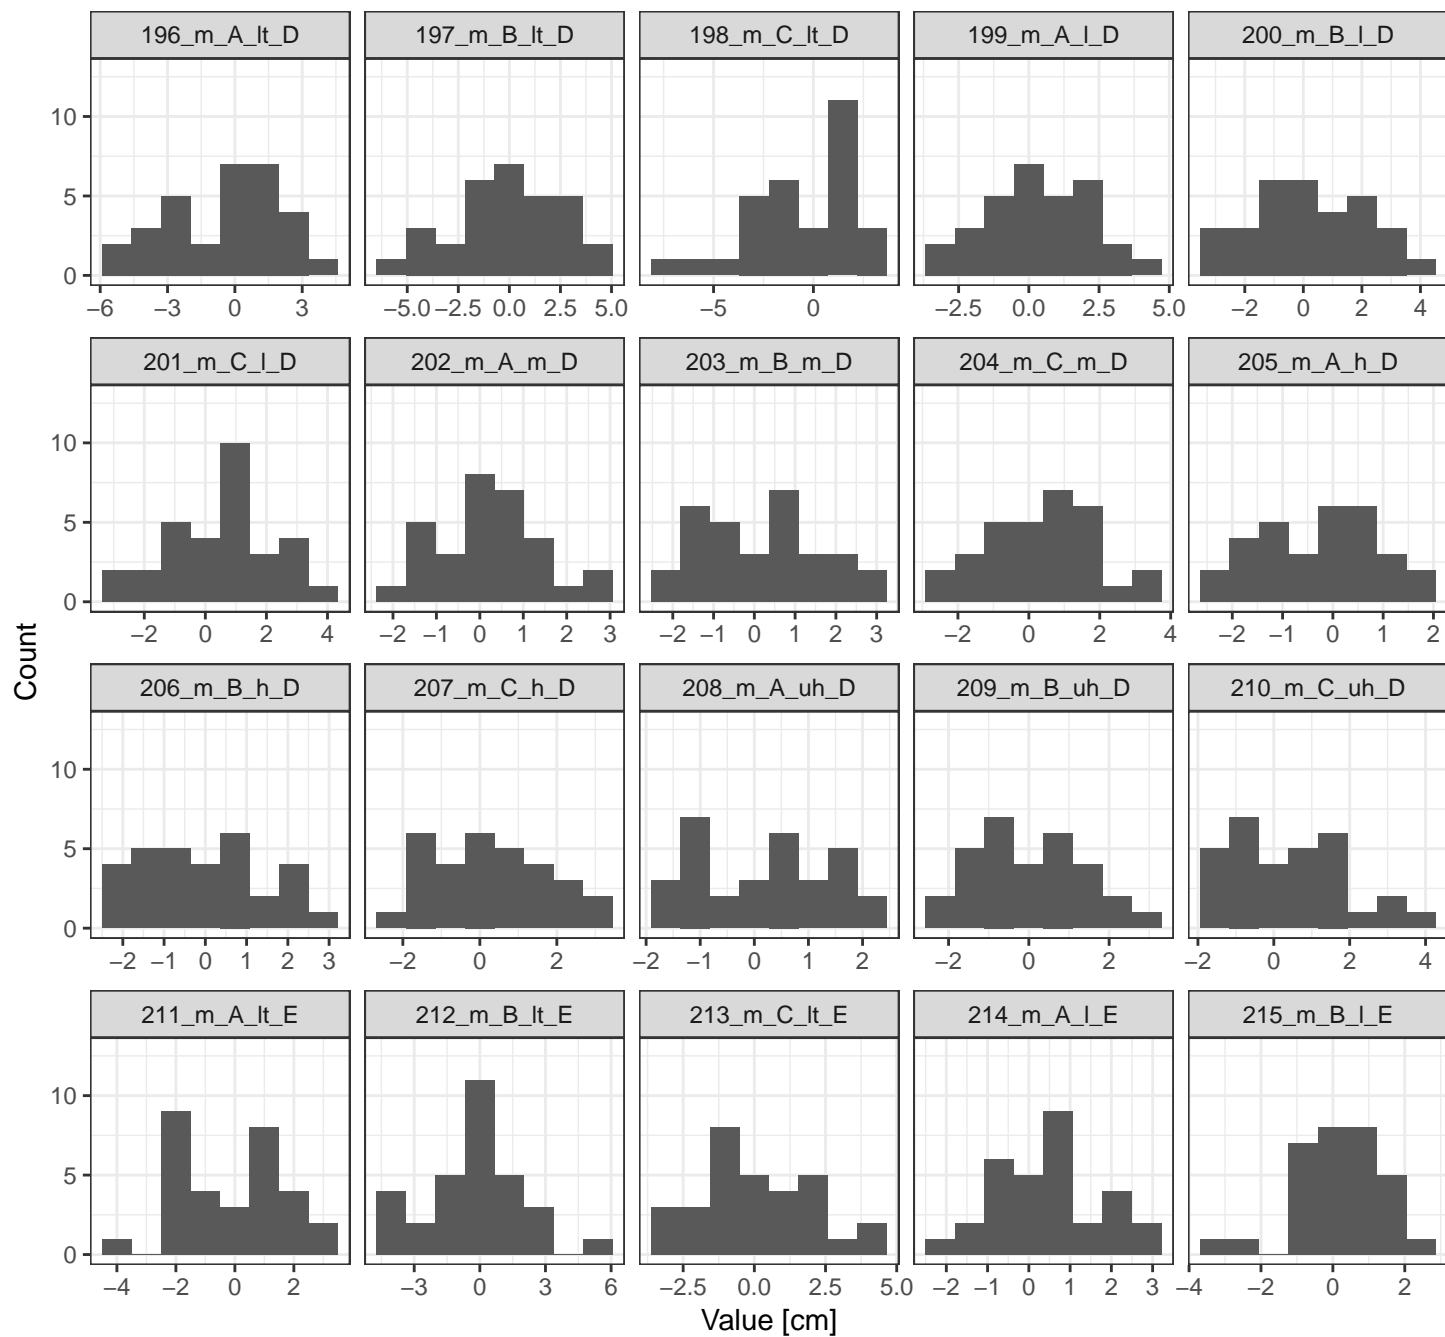

# Elevation differences between check points and model

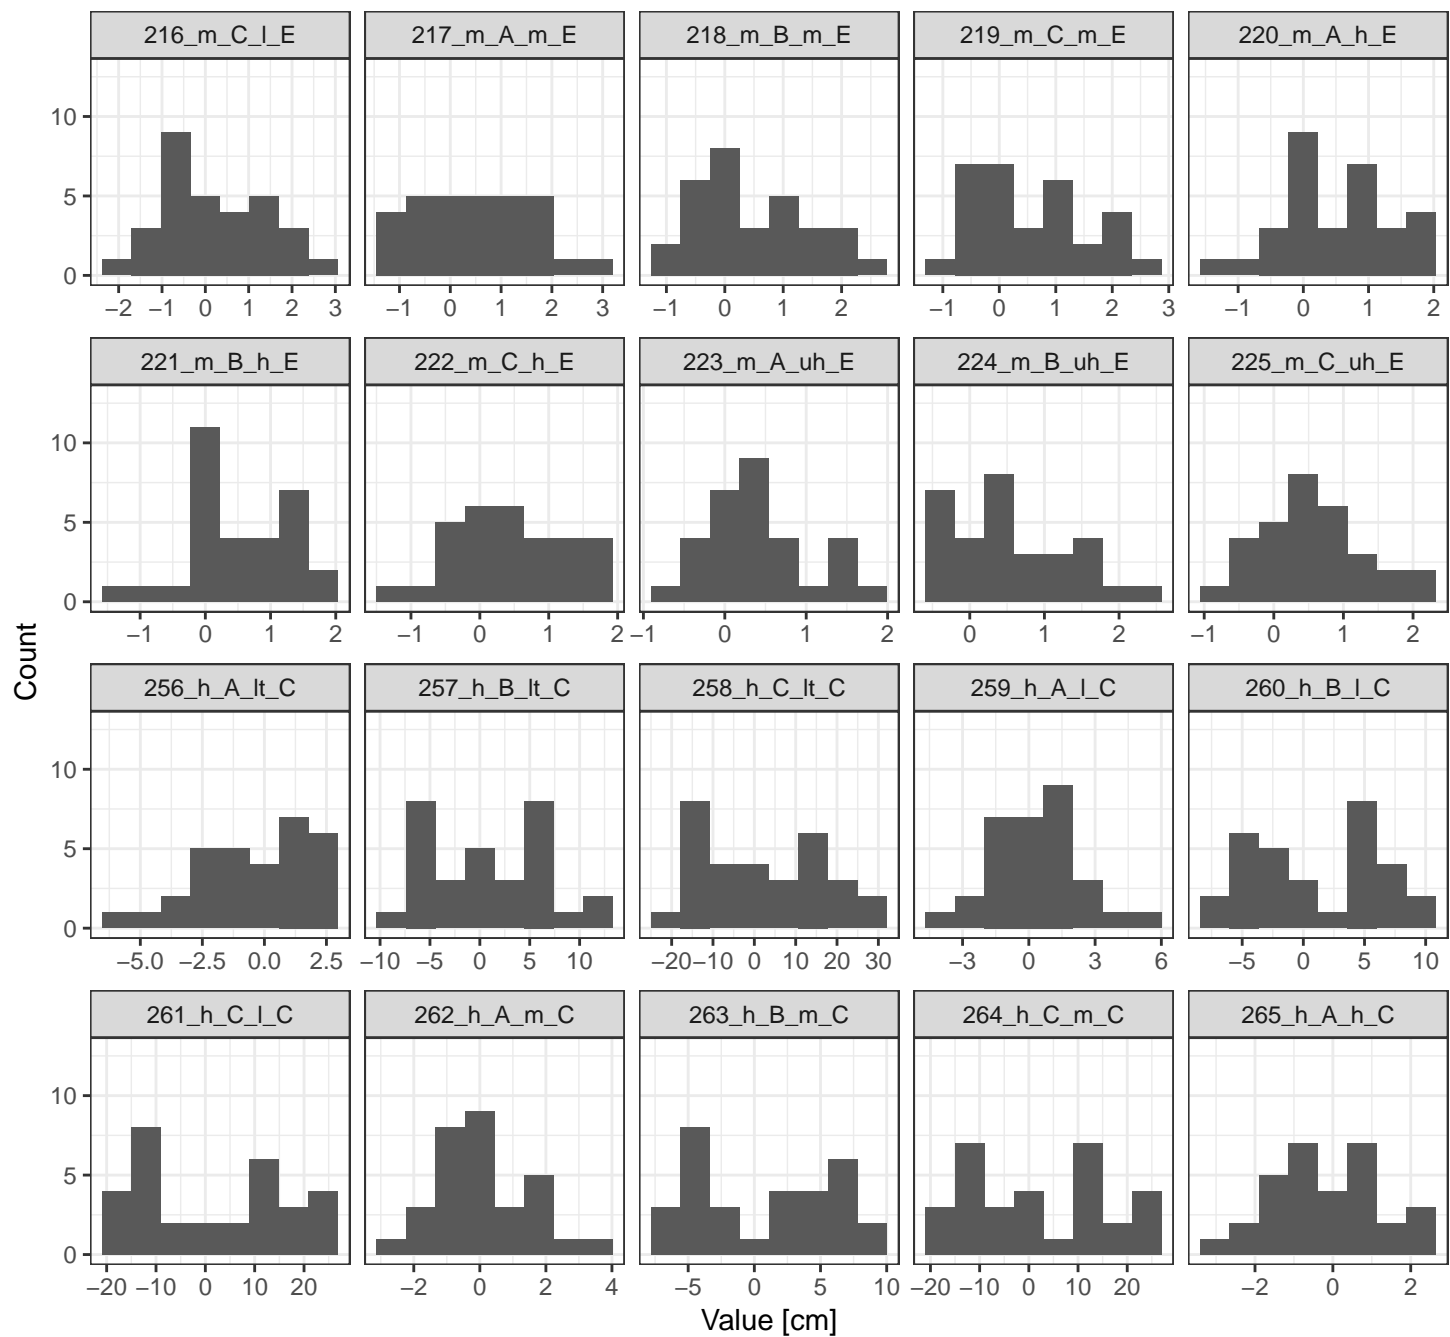

Elevation differences between check points and model

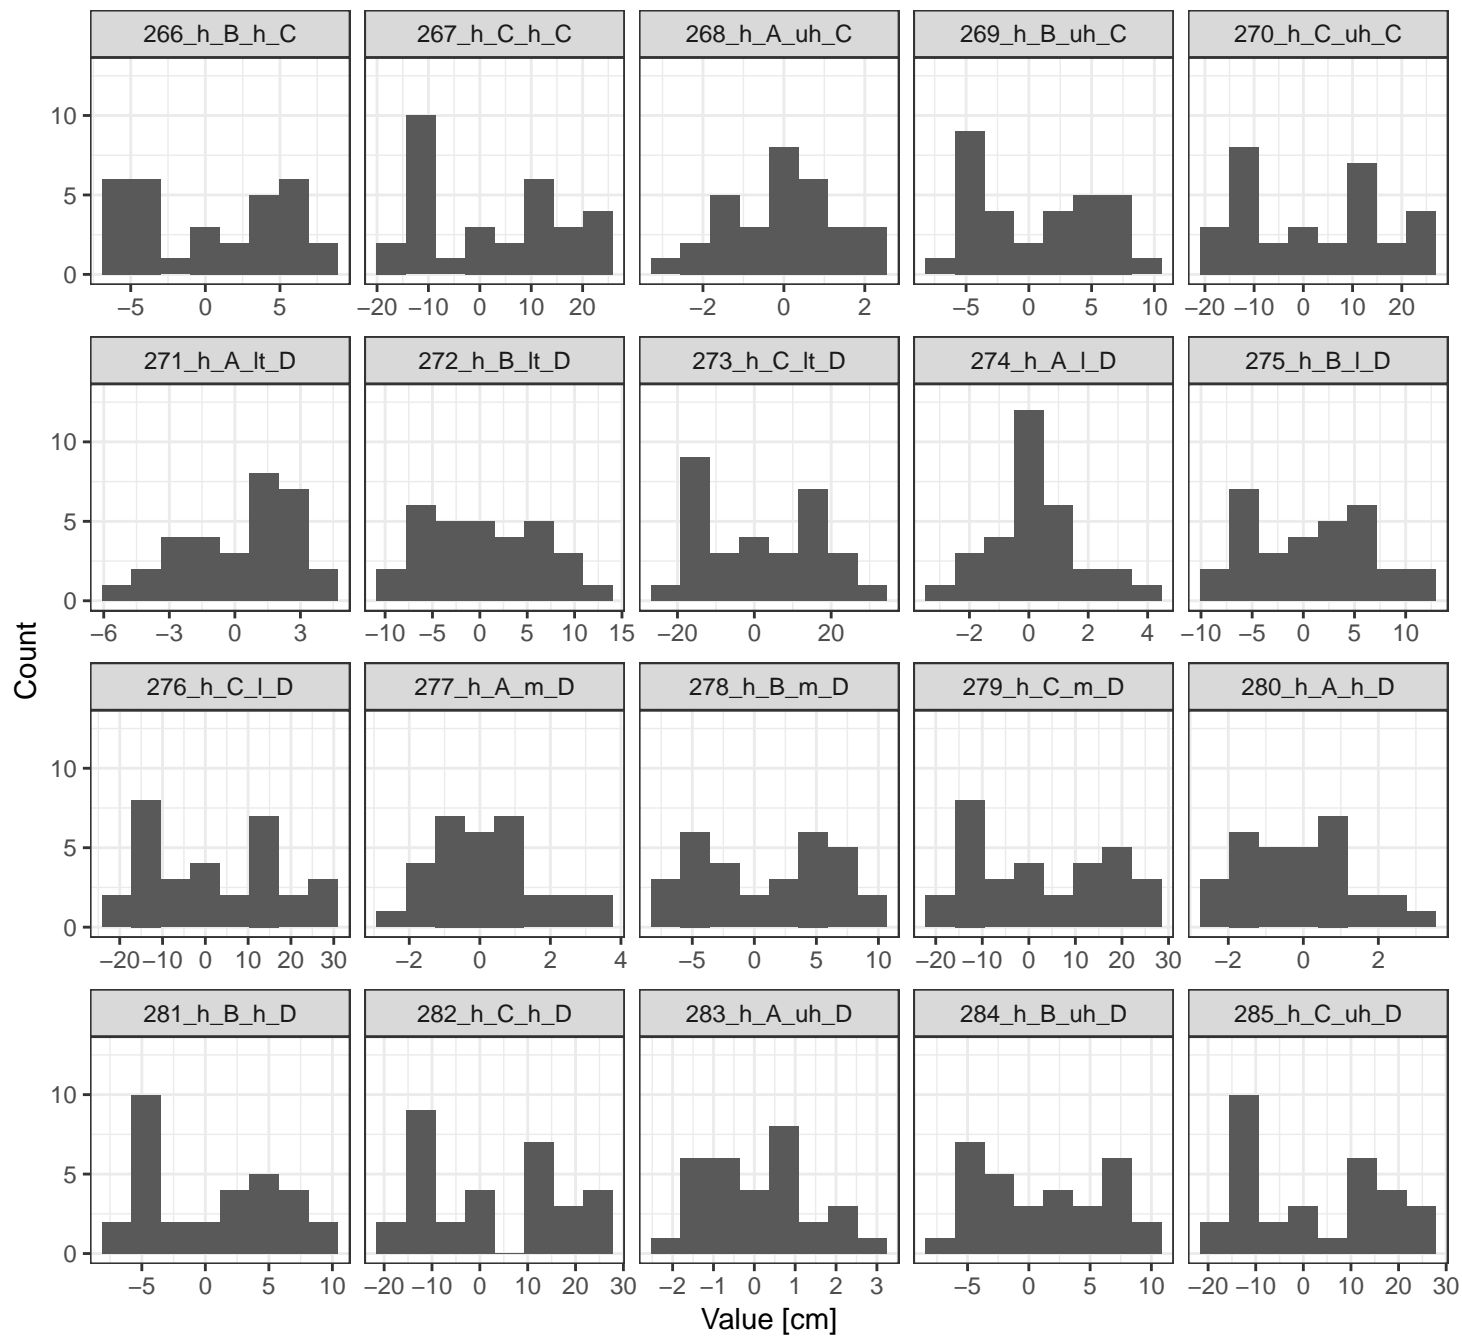

# Elevation differences between check points and model

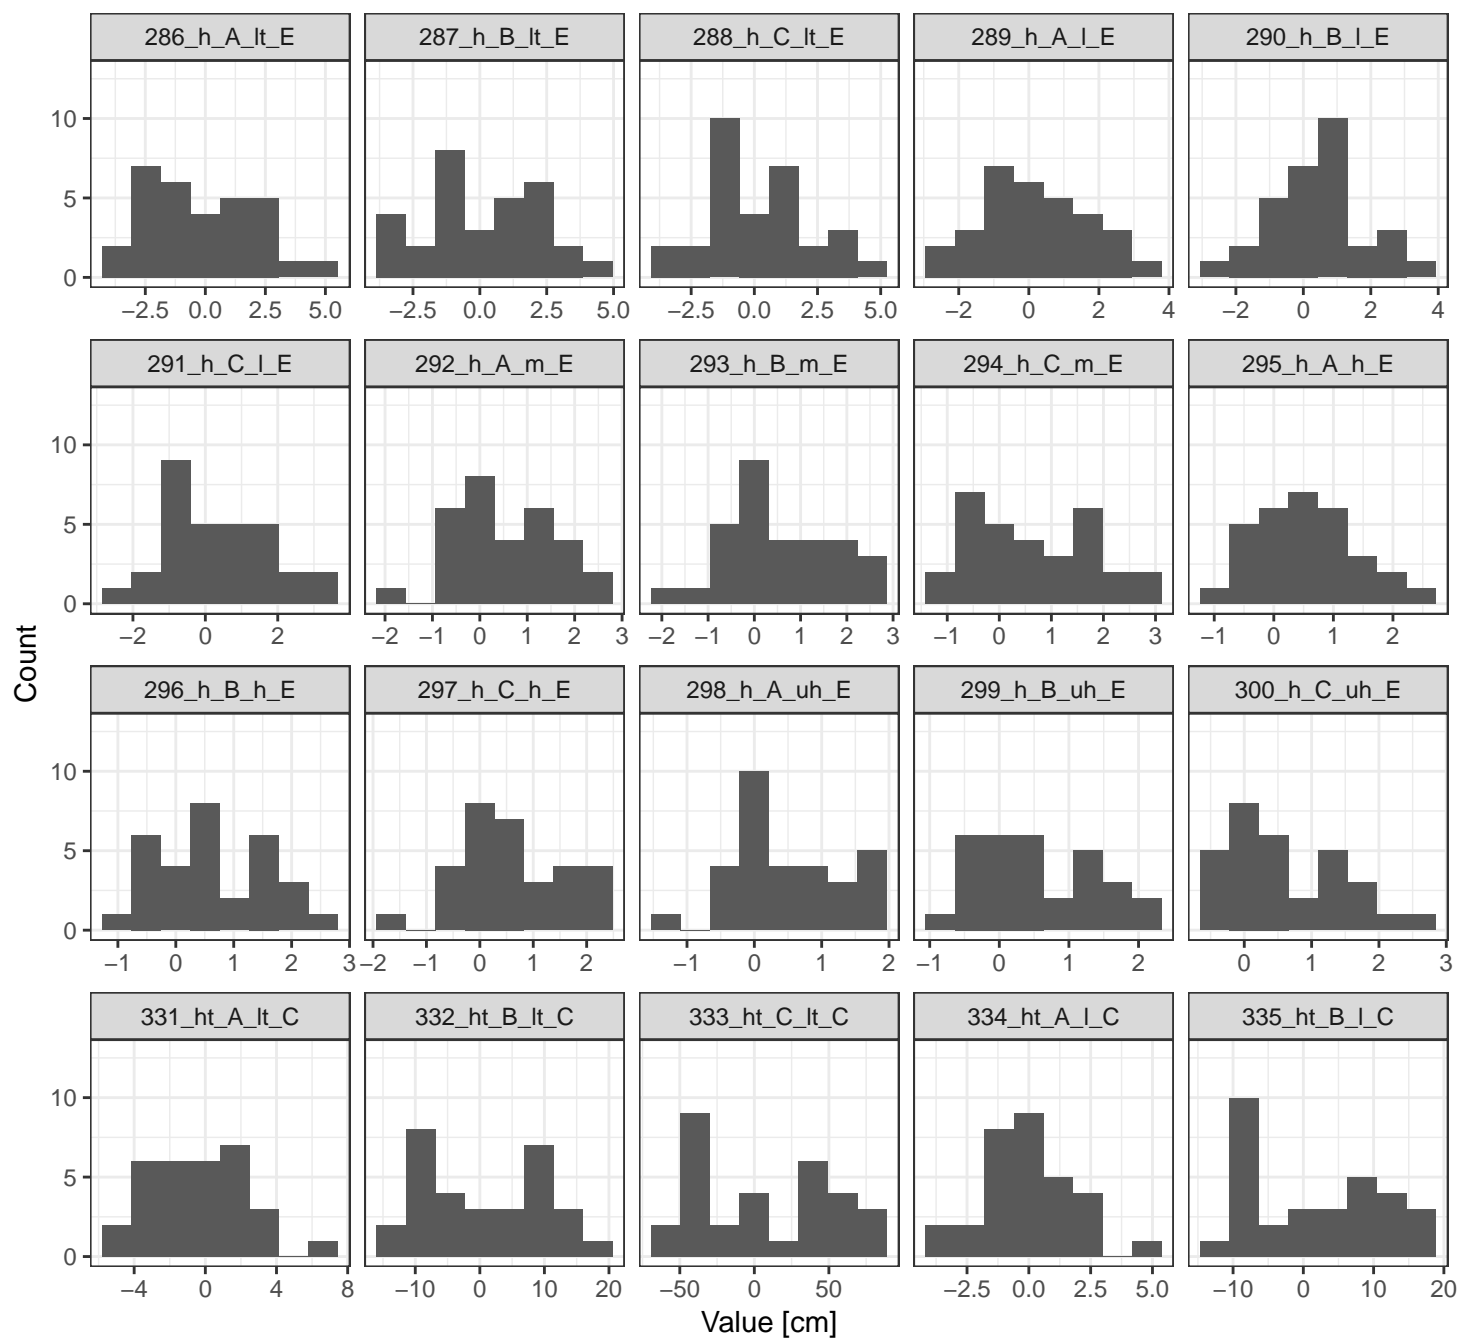

Elevation differences between check points and model

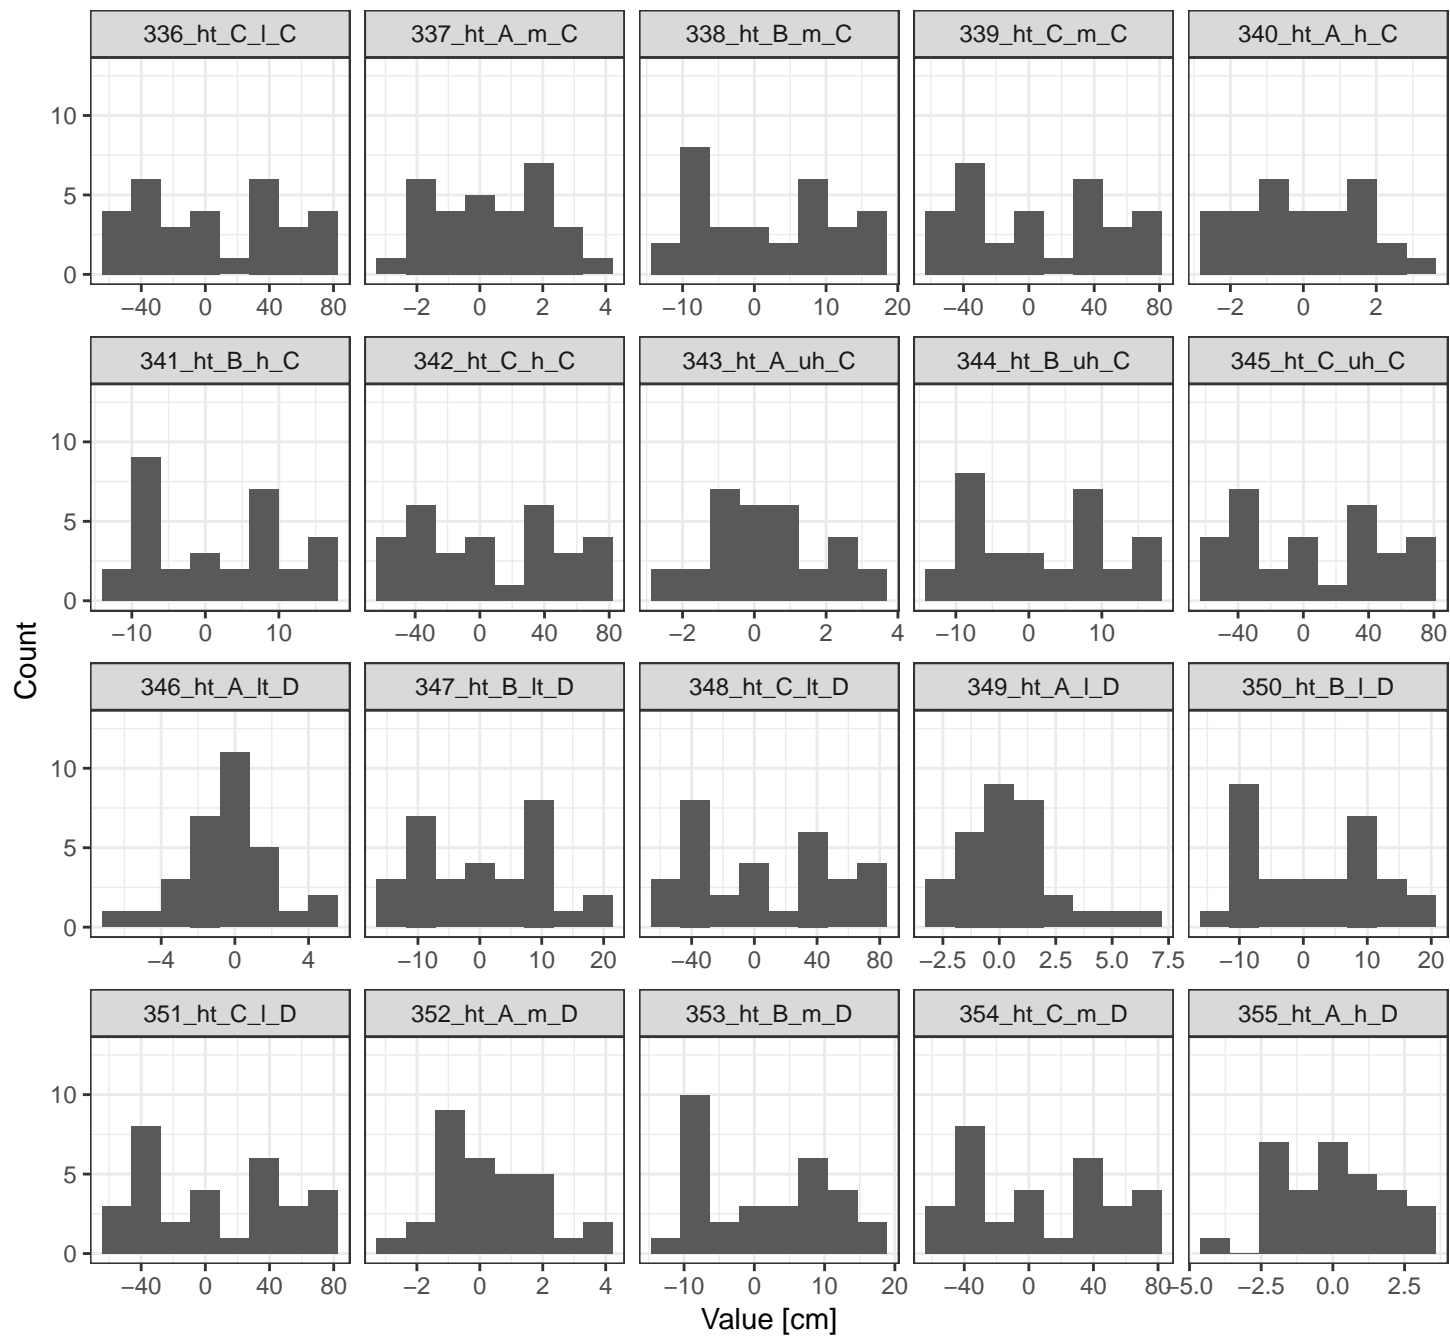



# Elevation differences between check points and model

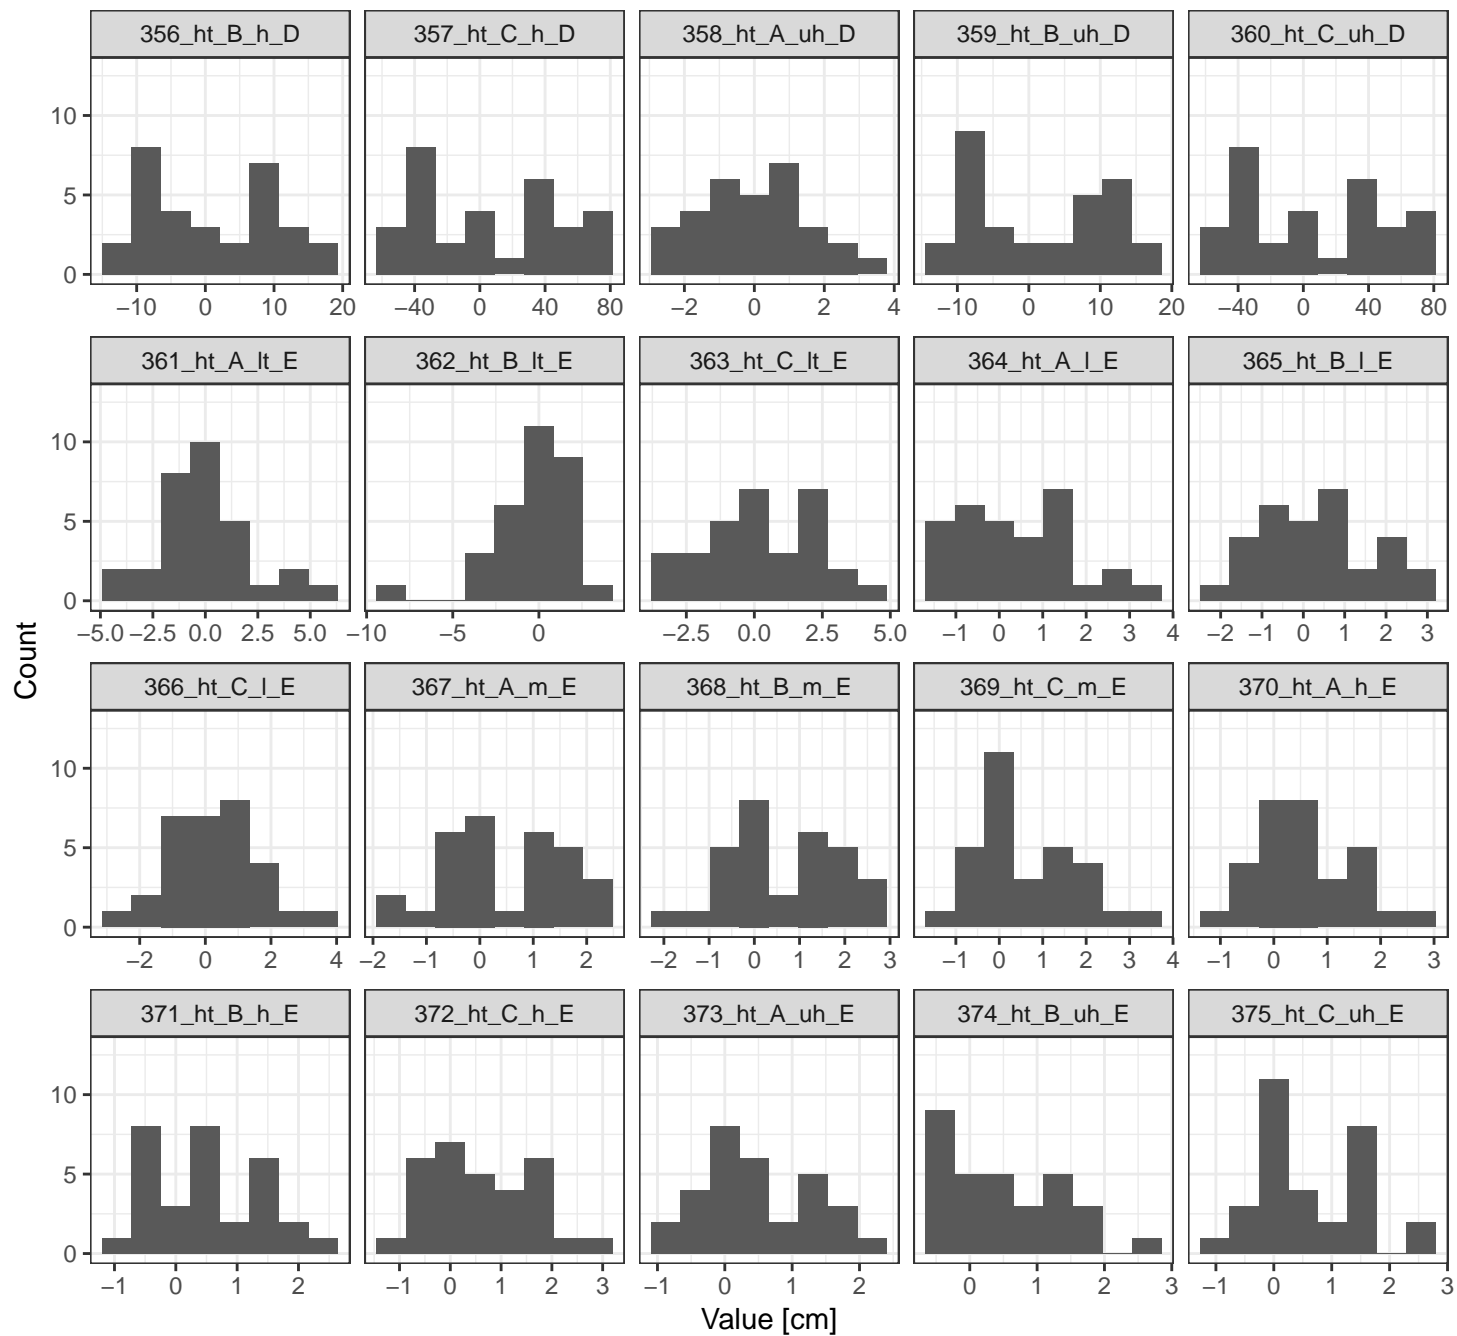

Supplement: s1 [file s1]
